# Supplementary material
Source: publisher site journal article supplement (https://www.spandidos-publications.com/7401/downloadSupplementary)
Supplement: Supplementary file 1 [file downloadSupplementary]

## Sheet: CPSF2 NORMAL
Data S1. The satisfactory ROC curve results.
Percentage contibution of High Positive: 0.07926
Percentage contibution of Positive: 4.763
Percentage contibution of Low Positive: 56.0079
Percentage contibution of Negative: 39.1498
The score is Low Positive
The score is Low Positive
65.7717

## Sheet: CPSF2 LIHC
Pixel Count: 1672880
Percentage contibution of High Positive: 1.8974
Percentage contibution of Positive: 15.8665
Percentage contibution of Low Positive: 56.8718
Percentage contibution of Negative: 25.3643
94.297

## Sheet: CPSF3 NORMAL
Pixel Count: 1672880
Percentage contibution of High Positive: 0.4069
Percentage contibution of Positive: 10.5336
Percentage contibution of Low Positive: 39.6504
Percentage contibution of Negative: 49.4091
The score is Low Positive
61.9383

## Sheet: CPSF3 LIHC
Pixel Count: 1672880
Percentage contibution of High Positive: 0.08083
Percentage contibution of Positive: 6.1765
Percentage contibution of Low Positive: 48.0878
Percentage contibution of Negative: 45.6549
The score is Low Positive
62.8657

## Sheet: CPSF6 NORMAL
Pixel Count: 1672880
Percentage contibution of High Positive: 4.7731
Percentage contibution of Positive: 9.4287
Percentage contibution of Low Positive: 14.7237
Percentage contibution of Negative: 71.0745
The score is Negative
47.9004

## Sheet: CPSF6 LIHC
Pixel Count: 1672880
Percentage contibution of High Positive: 6.5379
Percentage contibution of Positive: 17.2491
Percentage contibution of Low Positive: 18.6278
Percentage contibution of Negative: 57.5852
The score is Low Positive
72.3797

## Sheet: CPSF7 NORMAL
Pixel Count: 1672880
Percentage contibution of High Positive: 1.8315
Percentage contibution of Positive: 5.639
Percentage contibution of Low Positive: 30.3106
Percentage contibution of Negative: 62.2189
The score is Low Positive

## Sheet: CPSF7 LIHC
H-score
Pixel Count: 9000000
Percentage contibution of High Positive: 0.6075
Percentage contibution of Positive: 11.8299
Percentage contibution of Low Positive: 40.6558
Percentage contibution of Negative: 46.9068
The score is Low Positive
66.1381
